# Supplementary material for: Origin of the negative longitudinal piezoelectric effect and electric auxetic effect in hexagonal AIBIVCV semiconductors
Source: Royal Society of Chemistry journal article supplement (doi:10.1039/d3cp01717f), 2023-01-01
Supplement: d3cp01717f1.pdf [file d3cp01717f1.pdf]

## Supplementary data

**Table S1.** Calculated lattice constants  $a$  and  $c$  (in units of Å), lattice constants ratio  $c/a$ , the  $A$ - $B$  layer spacing  $d_{A-B}$ ,  $A$ - $C$  layer spacing  $d_{A-C}$ , and  $B$ - $C$  layer spacing  $d_{B-C}$ , along the polar axis (in units of Å), ratio of electronegativity difference  $\Delta\chi = (\chi_B - \chi_A)/(\chi_C - \chi_A)$ , band gap  $E_g$  (in units of eV), elastic constant  $C_{ij}$ , (in units of GPa), and spontaneous electric polarization  $P_S$  (in units of C/m<sup>2</sup>) of the hexagonal  $A^1B^{IV}C^V$  semiconductors. The available experimental lattice parameters (NaSnN,<sup>1</sup> NaSnP,<sup>2</sup> NaSnAs,<sup>2</sup> KSnAs,<sup>3</sup> and KSnSb<sup>3</sup>) are also included (in parentheses).

|        | $a$         | $c$           | $c/a$ | $d_{A-B}$ | $d_{A-C}$ | $d_{B-C}$ | $\Delta\chi$ | $E_g$ | $C_{11}$ | $C_{12}$ | $C_{13}$ | $C_{33}$ | $C_{44}$ | $P_S$ |
|--------|-------------|---------------|-------|-----------|-----------|-----------|--------------|-------|----------|----------|----------|----------|----------|-------|
| LiGeN  | 2.98        | 9.32          | 3.13  | 2.37      | 1.30      | 0.98      | 0.45         | 1.46  | 252      | 50       | 13       | 115      | 19       | 1.82  |
| LiGeP  | 3.56        | 10.01         | 2.81  | 2.02      | 1.78      | 1.21      | 0.63         | 0.21  | 123      | 24       | 23       | 48       | 20       | 1.42  |
| NaGeN  | 3.07        | 10.41         | 3.39  | 2.57      | 1.71      | 0.93      | 0.45         | 1.70  | 208      | 44       | 18       | 131      | 26       | 1.85  |
| NaGeP  | 3.62        | 11.32         | 3.13  | 2.36      | 2.12      | 1.18      | 0.63         | 0.54  | 109      | 23       | 18       | 61       | 18       | 1.38  |
| NaGeAs | 3.76        | 11.41         | 3.03  | 2.28      | 2.18      | 1.24      | 0.64         | 0.25  | 92       | 21       | 18       | 51       | 16       | 1.30  |
| NaGeSb | 4.02        | 11.80         | 2.94  | 2.13      | 2.40      | 1.37      | 0.71         | 0.02  | 72       | 18       | 15       | 39       | 12       | 1.18  |
| KGeN   | 3.16        | 11.54         | 3.65  | 2.88      | 1.97      | 0.91      | 0.48         | 1.64  | 150      | 41       | 20       | 132      | 32       | 1.70  |
| KGeP   | 3.73        | 12.28         | 3.29  | 2.65      | 2.35      | 1.14      | 0.66         | 0.77  | 84       | 25       | 19       | 64       | 23       | 1.28  |
| KGeAs  | 3.87        | 12.36         | 3.19  | 2.57      | 2.40      | 1.20      | 0.67         | 0.42  | 70       | 21       | 18       | 55       | 20       | 1.20  |
| KGeSb  | 4.12        | 12.82         | 3.11  | 2.45      | 2.64      | 1.32      | 0.73         | 0.35  | 59       | 18       | 15       | 43       | 15       | 1.10  |
| LiSnN  | 3.24        | 9.90          | 3.05  | 2.65      | 1.13      | 1.17      | 0.37         | 1.03  | 181      | 49       | 12       | 67       | 7        | 1.38  |
| NaSnN  | 3.33 (3.33) | 10.89 (10.89) | 3.27  | 2.79      | 1.58      | 1.08      | 0.38         | 1.05  | 158      | 38       | 15       | 88       | 15       | 1.47  |
| NaSnP  | 3.87 (3.88) | 11.64 (11.66) | 3.00  | 2.58      | 1.92      | 1.32      | 0.52         | 0.56  | 81       | 20       | 16       | 44       | 13       | 1.13  |
| NaSnAs | 4.01 (4.00) | 11.66 (11.73) | 2.91  | 2.49      | 1.97      | 1.38      | 0.53         | 0.22  | 68       | 17       | 17       | 37       | 13       | 1.08  |
| KSnN   | 3.41        | 12.03         | 3.53  | 3.09      | 1.87      | 1.05      | 0.41         | 1.19  | 123      | 34       | 16       | 92       | 21       | 1.39  |
| KSnP   | 3.97        | 12.66         | 3.18  | 2.85      | 2.20      | 1.28      | 0.56         | 0.89  | 67       | 21       | 16       | 47       | 17       | 1.08  |
| KSnAs  | 4.11 (4.10) | 12.70 (12.84) | 3.09  | 2.77      | 2.25      | 1.33      | 0.56         | 0.44  | 58       | 18       | 16       | 40       | 16       | 1.02  |
| KSnSb  | 4.37 (4.36) | 12.99 (13.15) | 2.97  | 2.62      | 2.45      | 1.43      | 0.62         | 0.37  | 47       | 16       | 14       | 32       | 14       | 0.94  |

**Table S2.** The Born effective charge [ $Z_{33}^*(A)$ ,  $Z_{33}^*(B)$ , and  $Z_{33}^*(C)$ ], internal atomic relaxations in response to the longitudinal strain  $\{\partial u[(B) - (A)]/\partial \varepsilon_c$  and  $\partial u[(C) - (A)]/\partial \varepsilon_c\}$ , clamped-ion ( $e_{3i}^0$ ), internal-strain ( $e_{3i}^i$ ), and total ( $e_{3i}$ ) longitudinal and transverse piezoelectric stress coefficients (in units of C/m<sup>2</sup>), and longitudinal ( $d_{33}$ ) and transverse ( $d_{31}$ ) piezoelectric strain coefficients (in units of pC/N), of the hexagonal  $A^I B^{IV} C^V$  semiconductors. Materials with negative longitudinal piezoelectric effect are underscored.

|               | $Z_{33}^*(A)$ | $Z_{33}^*(B)$ | $Z_{33}^*(C)$ | $\frac{\partial u[(B) - (A)]}{\partial \varepsilon_c}$ | $\frac{\partial u[(C) - (A)]}{\partial \varepsilon_c}$ | $e_{33}^0$ | $e_{33}^i$ | $e_{33}$ | $e_{31}^0$ | $e_{31}^i$ | $e_{31}$ | $e_{15}$ | $d_{33}$ | $d_{31}$ | $d_{15}$ |
|---------------|---------------|---------------|---------------|--------------------------------------------------------|--------------------------------------------------------|------------|------------|----------|------------|------------|----------|----------|----------|----------|----------|
| <u>LiGeN</u>  | 1.63          | 0.53          | -2.16         | 0.13                                                   | 0.05                                                   | -0.36      | -0.19      | -0.55    | -0.23      | 0.05       | -0.18    | -0.66    | -4.70    | -0.38    | -35.37   |
| LiGeP         | 1.92          | -0.35         | -1.57         | 0.09                                                   | -0.03                                                  | 0.02       | 0.03       | 0.05     | -0.30      | -0.10      | -0.40    | 0.16     | 4.20     | -3.36    | 8.02     |
| <u>NaGeN</u>  | 1.44          | 0.47          | -1.91         | 0.09                                                   | 0.02                                                   | -0.20      | 0.01       | -0.19    | -0.22      | 0.04       | -0.18    | -0.41    | -1.24    | -0.64    | -15.71   |
| NaGeP         | 1.72          | -0.30         | -1.42         | 0.07                                                   | -0.02                                                  | -0.01      | 0.03       | 0.01     | -0.18      | -0.06      | -0.24    | -0.10    | 1.42     | -2.02    | -5.74    |
| NaGeAs        | 1.79          | -0.52         | -1.26         | 0.05                                                   | -0.05                                                  | 0.03       | 0.08       | 0.12     | -0.23      | -0.04      | -0.26    | 0.01     | 4.38     | -3.03    | 0.53     |
| NaGeSb        | 1.86          | -0.78         | -1.08         | 0.03                                                   | -0.08                                                  | 0.10       | 0.15       | 0.25     | -0.23      | -0.03      | -0.26    | 0.15     | 10.05    | -4.56    | 12.24    |
| <u>KGeN</u>   | 1.61          | 0.33          | -1.94         | 0.11                                                   | 0.06                                                   | -0.07      | -0.31      | -0.38    | -0.18      | -0.03      | -0.21    | -0.40    | -2.67    | -0.81    | -12.58   |
| <u>KGeP</u>   | 1.71          | -0.37         | -1.34         | 0.07                                                   | 0.00                                                   | 0.01       | -0.07      | -0.06    | -0.15      | -0.06      | -0.21    | -0.13    | 0.21     | -1.97    | -5.94    |
| KGeAs         | 1.75          | -0.71         | -1.04         | 0.05                                                   | -0.02                                                  | 0.07       | -0.02      | 0.05     | -0.24      | -0.07      | -0.31    | -0.08    | 3.75     | -4.18    | -4.20    |
| KGeSb         | 1.79          | -0.92         | -0.88         | 0.01                                                   | -0.07                                                  | 0.11       | 0.10       | 0.21     | -0.23      | -0.08      | -0.30    | 0.04     | 8.68     | -5.60    | 2.79     |
| <u>LiSnN</u>  | 1.67          | 0.48          | -2.15         | 0.17                                                   | 0.08                                                   | -0.33      | -0.31      | -0.64    | -0.17      | 0.17       | -0.01    | -0.60    | -9.61    | 0.46     | -82.35   |
| <u>NaSnN</u>  | 1.52          | 0.35          | -1.87         | 0.11                                                   | 0.04                                                   | -0.21      | -0.09      | -0.30    | -0.19      | 0.09       | -0.10    | -0.36    | -3.36    | -0.27    | -24.20   |
| <u>NaSnP</u>  | 1.76          | -0.14         | -1.63         | 0.10                                                   | 0.00                                                   | -0.07      | -0.05      | -0.12    | -0.21      | -0.06      | -0.27    | -0.19    | -0.84    | -2.49    | -15.07   |
| <u>NaSnAs</u> | 1.83          | -0.39         | -1.44         | 0.08                                                   | -0.02                                                  | 0.00       | -0.03      | -0.02    | -0.26      | -0.05      | -0.32    | -0.13    | 3.34     | -4.40    | -10.15   |
| <u>KSnN</u>   | 1.53          | 0.32          | -1.85         | 0.12                                                   | 0.07                                                   | -0.11      | -0.26      | -0.37    | -0.12      | 0.04       | -0.09    | -0.36    | -3.97    | -0.16    | -17.31   |
| <u>KSnP</u>   | 1.66          | -0.18         | -1.48         | 0.10                                                   | 0.03                                                   | -0.04      | -0.13      | -0.17    | -0.14      | -0.04      | -0.19    | -0.21    | -2.53    | -1.69    | -12.63   |
| <u>KSnAs</u>  | 1.70          | -0.47         | -1.23         | 0.08                                                   | 0.01                                                   | 0.02       | -0.10      | -0.09    | -0.20      | -0.05      | -0.26    | -0.17    | 0.58     | -3.49    | -10.94   |
| <u>KSnSb</u>  | 1.77          | -0.69         | -1.08         | 0.05                                                   | -0.03                                                  | 0.07       | 0.00       | 0.07     | -0.21      | -0.06      | -0.26    | -0.05    | 7.41     | -5.88    | -4.02    |

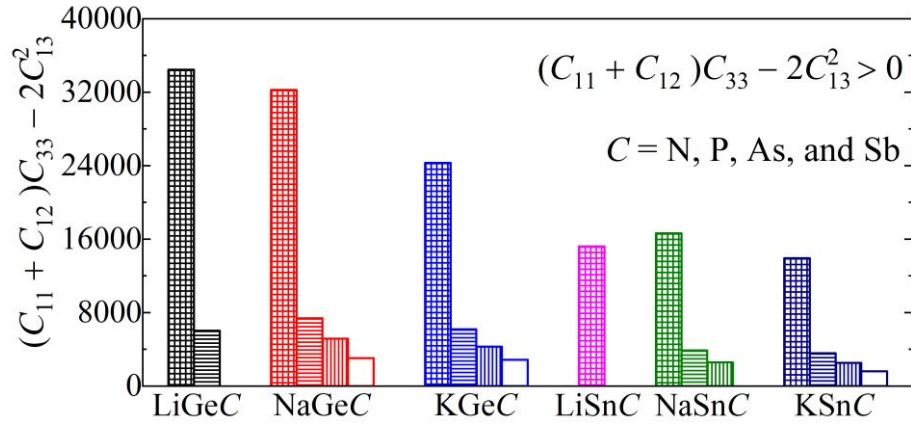

**Fig. S1.** Born criterion for mechanical stability  $(C_{11} + C_{12})C_{33} - 2C_{13}^2$  for the hexagonal  $A^I B^{IV} C^V$  semiconductors. Other criteria ( $C_{44} > 0$  and  $C_{11} - |C_{12}| > 0$ ) can be found in Table S1.

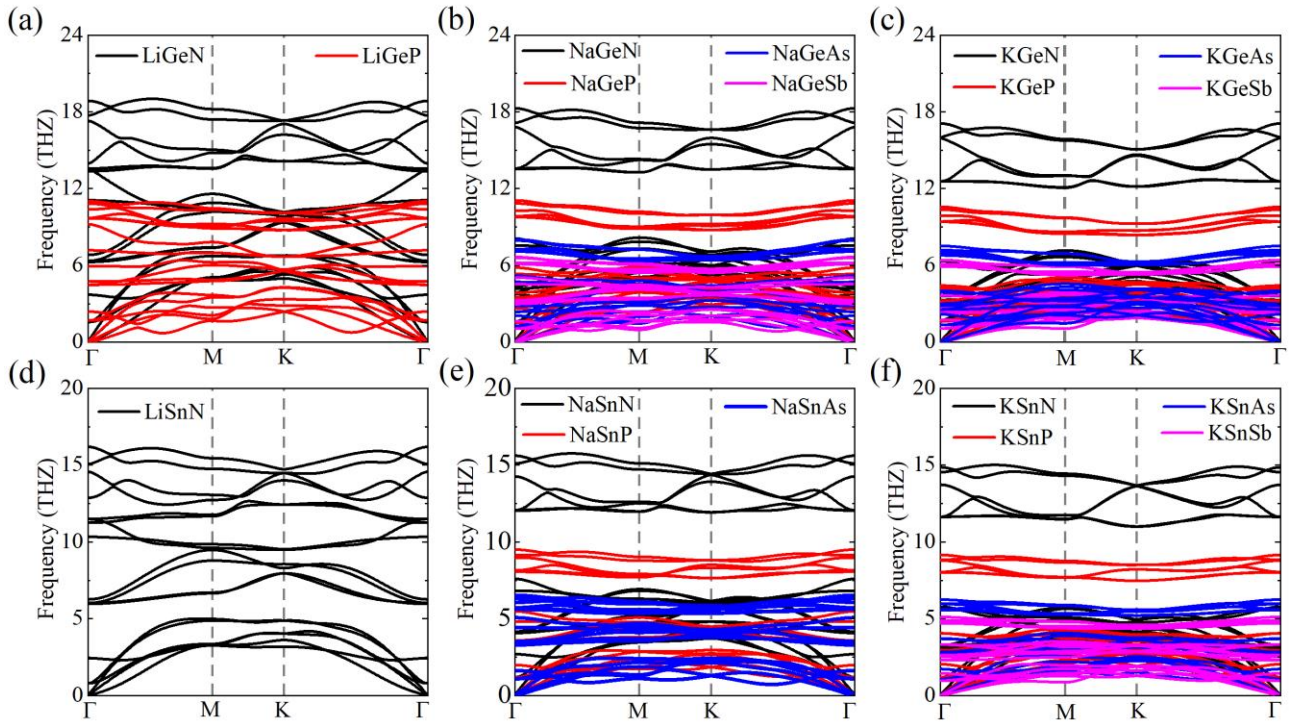

**Fig. S2.** Phonon dispersion relations for the hexagonal  $A^I B^{IV} C^V$  semiconductors.

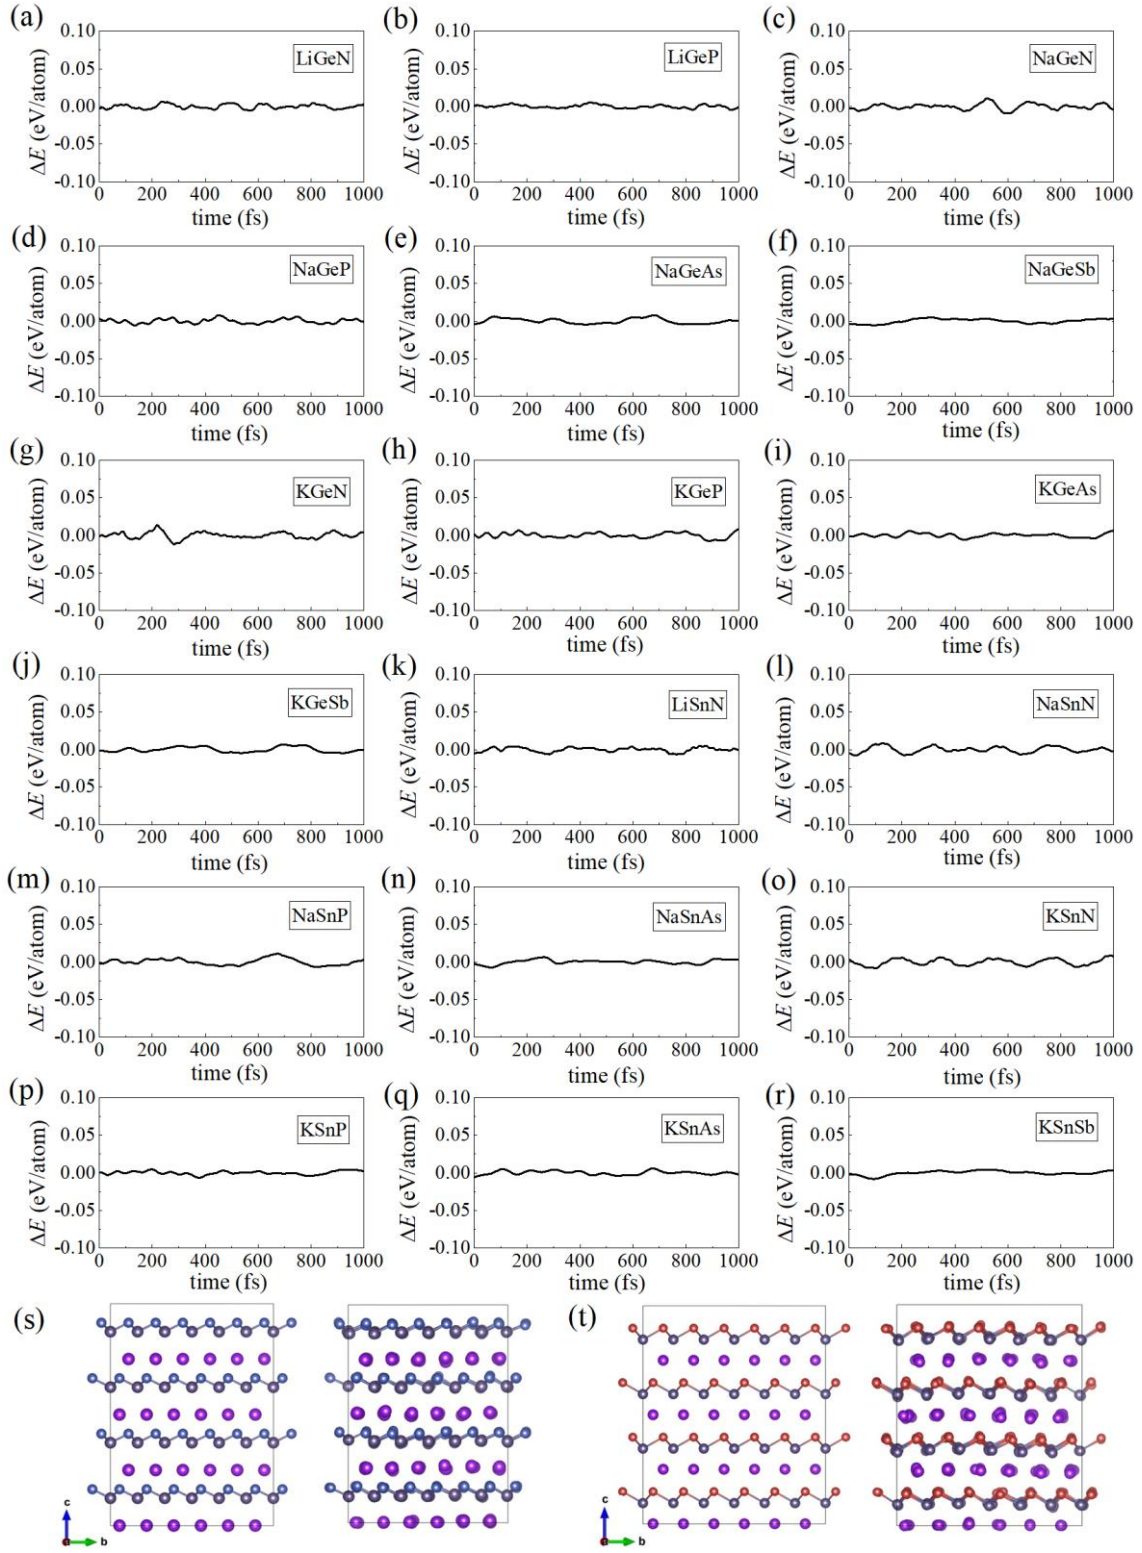

**Fig. S3.** (a-r) The evolution of the total energy during the *ab initio* molecular dynamics (AIMD) simulations at 300 K for the hexagonal  $A^I B^IV C^V$  semiconductors. AIMD simulations are performed on a  $6 \times 6 \times 2$  supercell. Instantaneous structure at the initial and final AIMD steps for (s) KGeN and (t) KGeSb.

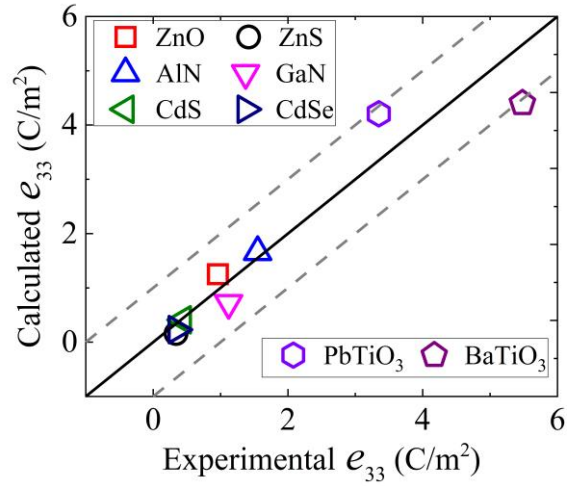

**Fig. S4.** Calculated longitudinal piezoelectric stress coefficients  $e_{33}$  vs experimentally measured  $e_{33}$  for wurtzite semiconductors (e.g., ZnO,<sup>4</sup> ZnS,<sup>5</sup> AlN,<sup>6</sup> GaN,<sup>6</sup> CdS,<sup>7</sup> and CdSe<sup>7</sup>) and ferroelectric perovskites (e.g., PbTiO<sub>3</sub><sup>8</sup> and BaTiO<sub>3</sub><sup>9</sup>).

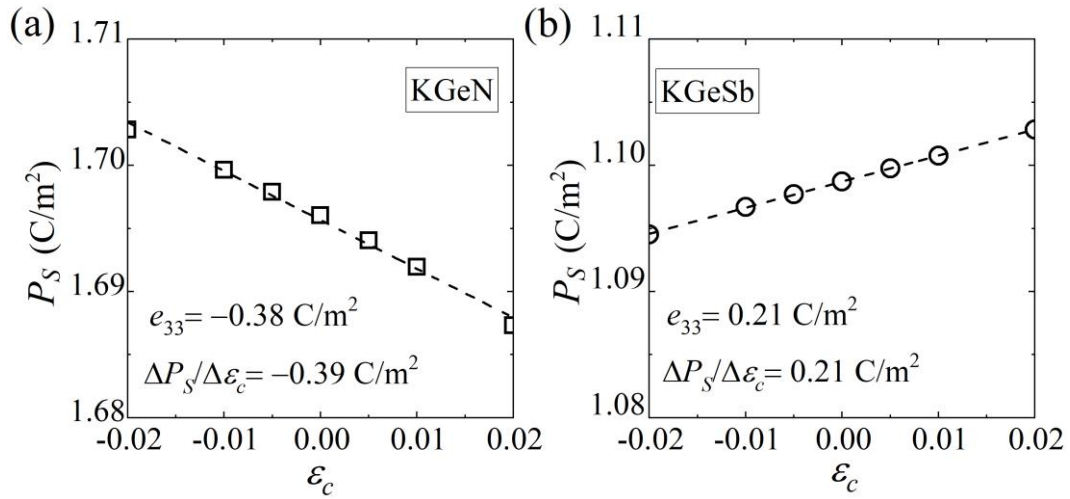

**Fig. S5.** Spontaneous polarization  $P_S$  for (a) KGeN and (b) KGeSb as a function of longitudinal strain  $\epsilon_c$  (the slope corresponds to piezoelectric stress coefficient  $e_{33}$ ).

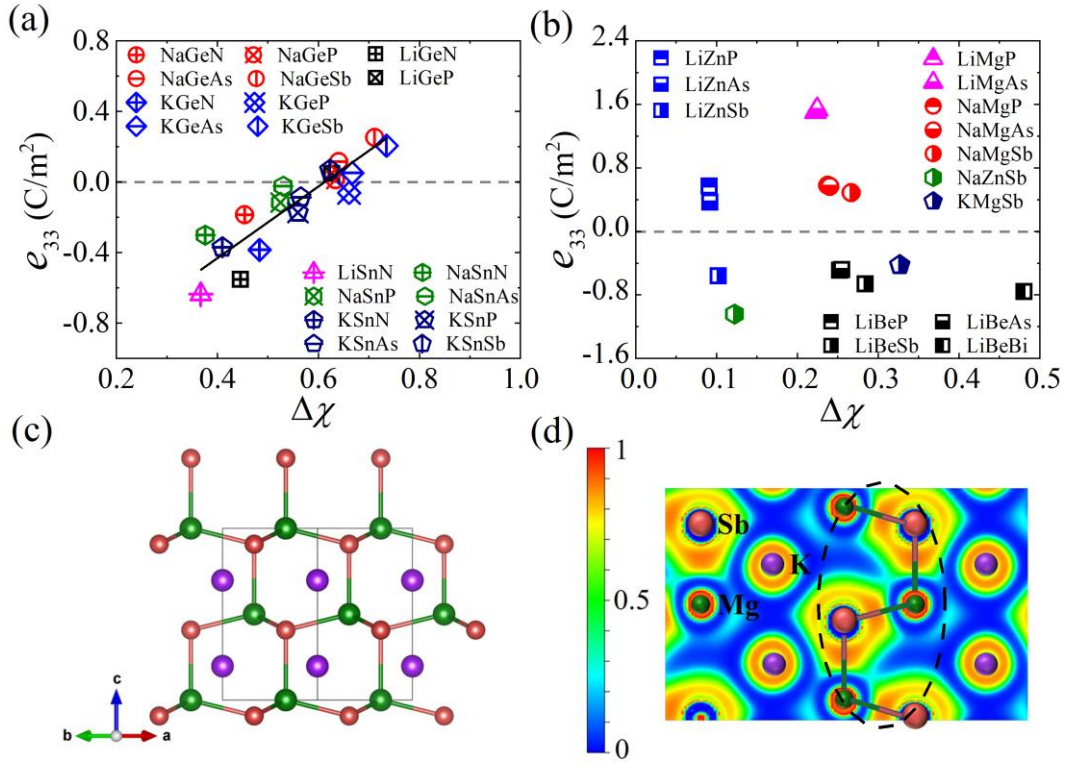

**Fig. S6.** The longitudinal piezoelectric stress coefficients  $e_{33}$  versus the ratio of electronegativity difference  $\Delta\chi = (\chi_B - \chi_A)/(\chi_C - \chi_A)$  for the hexagonal (a)  $A^I B^{IV} C^V$  and (b)  $A^I B^{III} C^V$  semiconductor. The  $e_{33}$  values for hexagonal  $A^I B^{III} C^V$  semiconductor are from Ref. 10. (c) Crystal structures of the hexagonal  $A^I B^{IV} C^V$  semiconductor and (d) the electron localization function (ELF) projected along the [110] plane for KMgSb.

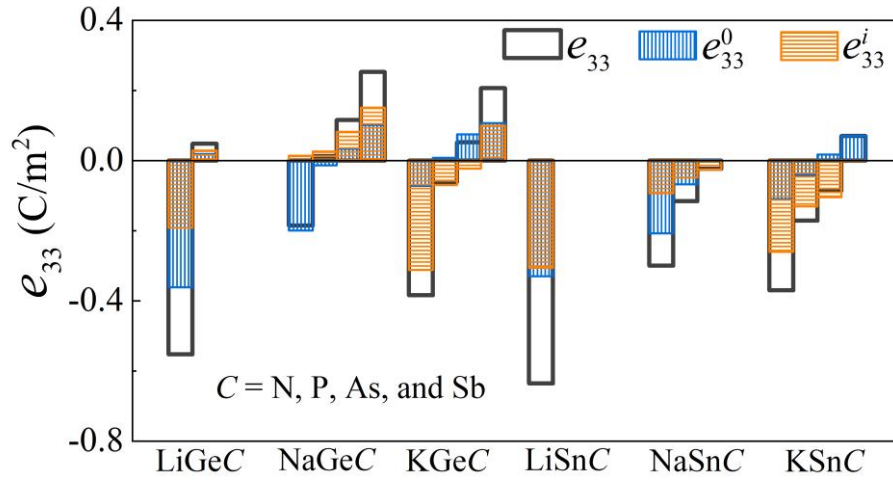

**Fig. S7.** The calculated clamped-ion ( $e_{33}^0$ ), internal-strain ( $e_{33}^i$ ), and total ( $e_{33}$ ) piezoelectric coefficients of the hexagonal  $A^I B^{IV} C^V$  semiconductors.

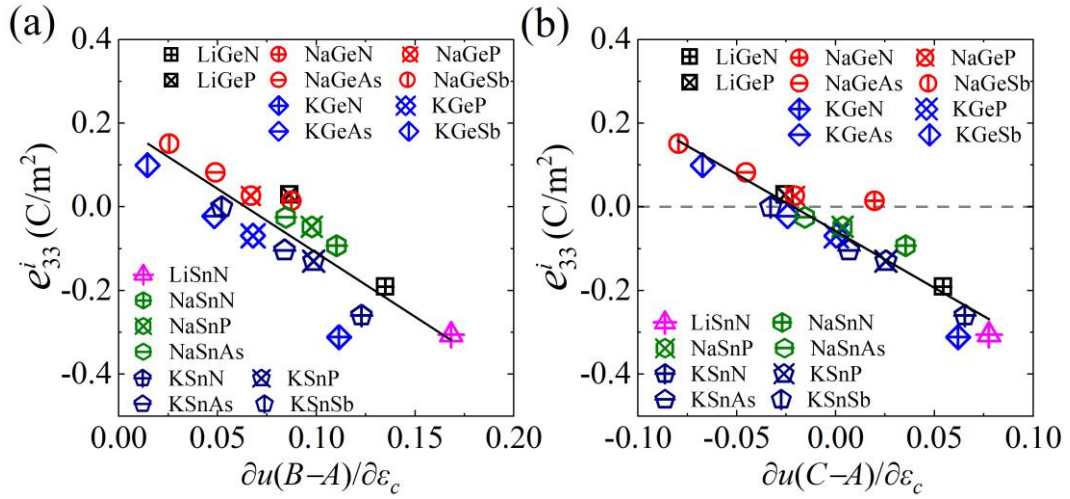

**Fig. S8.** Calculated internal-strain longitudinal piezoelectric stress coefficients  $e_{33}^i$  vs internal atomic relaxations in response to the longitudinal strain  $\{\partial u[(B) - (A)]/\partial \epsilon_c, \partial u[(C) - (A)]/\partial \epsilon_c\}$  for the hexagonal  $A^1B^{IV}C^V$  semiconductor.

## References

1. N. S. P. Watney, Z. A. Gál, M. D. S. Webster and S. J. Clarke, *Chem. Commun.*, 2005, 4190-4192.
2. Z. Lin, G. Wang, C. Le, H. Zhao, N. Liu, J. Hu, L. Guo and X. Chen, *Phys. Rev. B*, 2017, **95**, 165201.
3. K. H. Lii and R. C. Haushalter, *J. Solid State Chem.*, 1987, **67**, 374-378.
4. I. B. Kobiakov, *Solid State Commun.*, 1980, **35**, 305-310.
5. J. G. Gualtieri, J. A. Kosinski and A. Ballato, *IEEE Trans. Ultrason. Ferroelectr: Freq. Control*, 1994, **41**, 53-59.
6. I. L. Guy, S. Muensit and E. M. Goldys, *Appl. Phys. Lett.*, 1999, **75**, 4133-4135.
7. D. Berlincourt, H. Jaffe and L. R. Shiozawa, *Phys. Rev.*, 1963, **129**, 1009-1017.
8. Z. Li, M. Grimsditch, X. Xu and S. K. Chan, *Ferroelectrics*, 1993, **141**, 313-325.
9. Z. Li, S. K. Chan, M. H. Grimsditch and E. S. Zouboulis, *J. Appl. Phys.*, 1991, **70**, 7327-7332.
10. S. Liu and R. E. Cohen, *Phys. Rev. Lett.*, 2017, **119**, 207601.
